# Supplementary material for: Molecular and Electrophysiological Role of Diabetes-Associated Circulating Inflammatory Factors in Cardiac Arrhythmia Remodeling in a Metabolic-Induced Model of Type 2 Diabetic Rat
Source: MDPI journal article supplement (doi:10.3390/ijms22136827), 2021-06-25
Supplement: s1 [file s1]

**Supplementary Table S1.** Animal characteristics for control, chow + streptozotocin, high-fat diet (HFD), and DIABETIC (HFD + STZ) groups, measured at week 6.

|                       | Control     | Chow + STZ        | HFD             | Diabetic       |
|-----------------------|-------------|-------------------|-----------------|----------------|
| Body weight (g)       | 364.1 ± 4.2 | 331.7 ± 12.3 *    | 374 ± 4.7 *     | 346.8 ± 10     |
| Glucose (mg/dL)       | 101.1 ± 2.5 | 127.8 ± 7.2 **, # | 122 ± 5.6 **, # | 175.05 ± 12 ** |
| Cholesterol (mg/dL)   | 67.1 ± 9.4  | 100 ± 34          | 198.6 ± 16.8 ** | 183 ± 20.6 **  |
| Triglycerides (mg/dL) | 146.1 ± 32  | 205.1 ± 60.3      | 169.2 ± 57      | 207.7 ± 15.5 * |
| IPIGTT (AUC)          | 394 ± 16    | 413 ± 92          | 519 ± 107 *     | 723 ± 56 **    |
| Insulin (ng/mL)       | 2.2 ± 0.2   | 1.9 ± 0.01        | 2.2 ± 0.1       | 2.4 ± 0.2      |
| Epid. Fat (g)         | 4.1 ± 0.4   | 3.3 ± 0.4 *, ##   | 7.2 ± 0.5 **    | 6.2 ± 0.5 **   |

Data are mean ± SEM, n = 4-17 per group; \*  $p < 0.05$ , \*\*  $p < 0.01$  compared to control; #  $p < 0.05$ ,  
##  $p < 0.01$  compared to DIAB group.

**Supplementary Table S2.** Electrocardiographic characteristics for control, chow + streptozotocin (Chow + STZ), high-fat diet (HFD), and DIABETIC (HFD + STZ) groups, measured at week 6.

|                                          | Control      | Chow + STZ      | HFD          | Diabetic       |
|------------------------------------------|--------------|-----------------|--------------|----------------|
| RR (ms)                                  | 141.2 ± 2.5  | 159.6 ± 7.24 ** | 136.2 ± 1.17 | 157.6 ± 3.9 ** |
| PR (ms)                                  | 44.48 ± 1.01 | 44.41 ± 1.36    | 45.34 ± 1.16 | 44.07 ± 0.92   |
| P (ms)                                   | 13.65 ± 0.35 | 14.68 ± 0.82    | 15 ± 0.58    | 14.94 ± 0.42   |
| QRS (ms)                                 | 17.16 ± 0.3  | 17.04 ± 0.71    | 16.32 ± 0.82 | 18.79 ± 0.93   |
| QT (ms)                                  | 64.2 ± 1.3   | 66 ± 2.2        | 67.5 ± 1.5   | 76.5 ± 1.5 **  |
| QTc (ms)                                 | 122.8 ± 1    | 125.5 ± 1.56    | 116.6 ± 1.2  | 141.4 ± 1.3 ** |
| T <sub>peak</sub> -T <sub>end</sub> (ms) | 29.4 ± 1.4   | 33.9 ± 1.1      | 35 ± 1.5     | 42.4 ± 1.3 **  |

Data are mean ± SEM, n = 6-30 per group; \*\*  $p < 0.01$  compared to control.

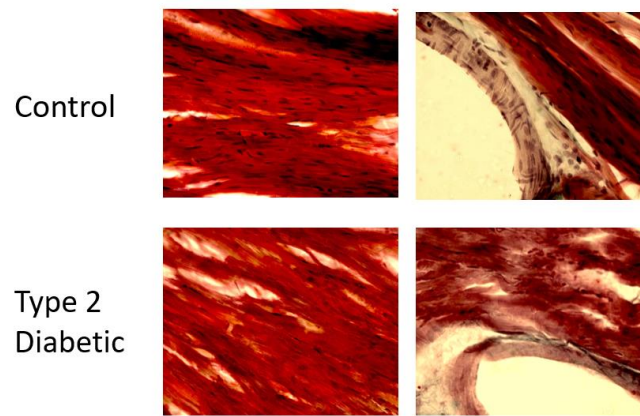

**Supplementary Figure 1. Myocardial structural characteristics.** Masson's trichrome stains show the absence of either interstitial or perivascular fibrosis in the type 2 diabetic hearts compared to controls.
